# Supplementary material for: Opposite effects of cations in enhancing and suppressing nucleation in the pathological crystallization of gout
Source: Royal Society of Chemistry journal article supplement (doi:10.1039/d1ce01178b), 2021-01-01
Supplement: d1ce01178b1.pdf [file d1ce01178b1.pdf]

## Supporting Information

### Opposite Effects for Cations in Enhancing and Suppressing Nucleation of Pathology Crystallization of Gout

Anqi Da<sup>+</sup>, Aijun Ren, Rong Cheng<sup>+</sup>, Xingde Zhang, Yonglan Pan, Chunyan Ou, Tingming Fu and  
Yonghai Liu\*

School of Pharmacy, Nanjing University of Chinese Medicine, Nanjing 210046, China

[liuyh@njucm.edu.cn](mailto:liuyh@njucm.edu.cn)

## Experimental

**Materials.** Uric acid (>99%), Calcium chloride (>99%), Potassium chloride (>99%), Sodium chloride (>99%), Ammonium chloride (>99%), Sodium hydroxide (>99%) were obtained from Sigma Aldrich and used without purification. Aqueous solutions were prepared using deionized water (18.2 M $\Omega$ ) purified with a Nanjing Yipuyida purification system.

**Table S1** Influence of various cations in different added concentration on solubilities of MSUM at 25 °C (pH = 7.4) in the presence of 5mM MSUM and 140mM NaCl, with a typical standard deviation of 0.2 mg/100g of H<sub>2</sub>O.

| Concentration of added cation (mM) | MgCl <sub>2</sub> (mg/dl) | NH <sub>4</sub> Cl(mg/dl) | KCl(mg/dl) | CaCl <sub>2</sub> (mg/dl) |
|------------------------------------|---------------------------|---------------------------|------------|---------------------------|
| 0                                  | 4.2                       | 4.2                       | 4.2        | 4.2                       |
| 0.4                                | 4.2                       | 4.2                       | 4.2        | 4.1                       |
| 5                                  | 3.7                       | 3.8                       | 4.8        |                           |
| 15                                 | 2.8                       | 3.2                       | 6.3        |                           |
| 25                                 | 2                         | 2.5                       | 7.6        |                           |

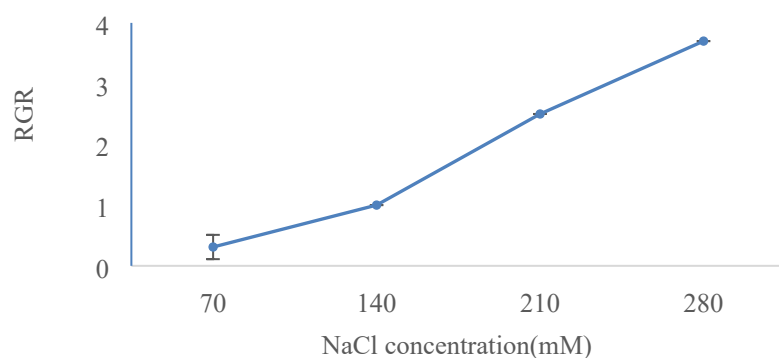

**Figure S1.** Influence of different concentrations of Na<sup>+</sup> on the relative growth rate of MSUM along the major growth directions (c-axis) of MSUM crystals at 25 °C in the presence of 5mM MSUM. The growth rate of a control sample (a solution in the presence of 140 mM NaCl and 5 mM MSUM at pH 7.4) is 3.1 $\mu$ m/s under the above experimental conditions. The growth rate data are an average of at least three measurements. Error bars equal 2 standard deviations.

**Table S2.** Results of induction time experiments in presence of various cations in different added concentration, 5mM MSUM and 140mM NaCl, including 95% confidence intervals from linear regression.

| Sample              | NH <sub>4</sub> Cl |      | KCl  |      | MgCl <sub>2</sub> |      | CaCl <sub>2</sub> |      |
|---------------------|--------------------|------|------|------|-------------------|------|-------------------|------|
|                     | S                  | τ(s) | S    | τ(s) | S                 | τ(s) | S                 | τ(s) |
| C <sup>α</sup> =0.4 | 22.6               | 141  | 22.6 | 101  | 22.6              | 132  | 23.2              | 127  |
| C <sup>α</sup> =5   | 25                 | 148  | 19.8 | 135  | 25.7              | 215  |                   |      |
| C <sup>α</sup> =15  | 29.7               | 271  | 15.1 | 206  | 33.9              | 360  |                   |      |
| C <sup>α</sup> =25  | 38                 | 307  | 12.5 | 223  | 47.5              | 456  |                   |      |

C<sup>α</sup>: The sample is C mM additive cationic solution containing 5mM MSUM and 140mM NaCl. τ is the induction time.

**Table S3** The ionic radius r,<sup>[1]</sup> Gibbs free energy of hydration and hydrated diameter α<sup>[2]</sup> for cations

| Items                                   | Mg <sup>2+</sup> | Ca <sup>2+</sup> | Na <sup>+</sup> | K <sup>+</sup> | NH <sub>4</sub> <sup>+</sup> |
|-----------------------------------------|------------------|------------------|-----------------|----------------|------------------------------|
| r (pm)                                  | 72               | 100              | 102             | 138            | 168                          |
| α (pm)                                  | 800              | 600              | 450             | 300            | 250                          |
| Δ <sub>hyd</sub> G/kJ mol <sup>-1</sup> | -1830            | -1505            | -365            | -295           | -285                         |

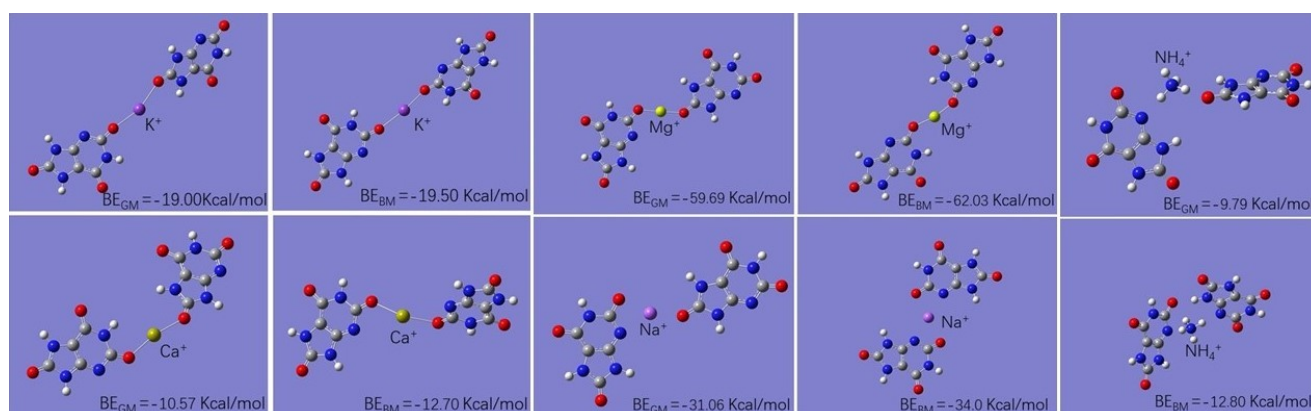

**Figure S2.** Optimized conformations and their Binding Energies (kcal mol<sup>-1</sup>) of chain cation bridges, urate(o2)<sup>-</sup>···cation<sup>+</sup>···urate(o8)<sup>-</sup> and urate(o2)<sup>-</sup>···cation<sup>+</sup>···urate(o2)<sup>-</sup>

## References

- [1] Marcus, Y. Thermodynamics of solvation of ions. Part 5.-Gibbs free energy of hydration at 298.15 K. *J. Chem. Soc. Faraday Trans.*, 1991, 87, 2995-2999.
- [2] Harris, D. C. Quantitative chemical analysis, w. H. Freeman and Company, New York, 9 edn, 2016, pp.165-166.
